# Supplementary material for: Preparation and gas separation properties of zeolite T membraneElectronic supplementary information (ESI) available: XRD patterns and FE-SEM photographs. See http://www.rsc.org/suppdata/cc/b3/b305947b/
Source: Royal Society of Chemistry journal article supplement (doi:10.1039/b305947b), 2003-01-01
Supplement: b305947b(s2).doc [file b305947b%28s2%29.doc]

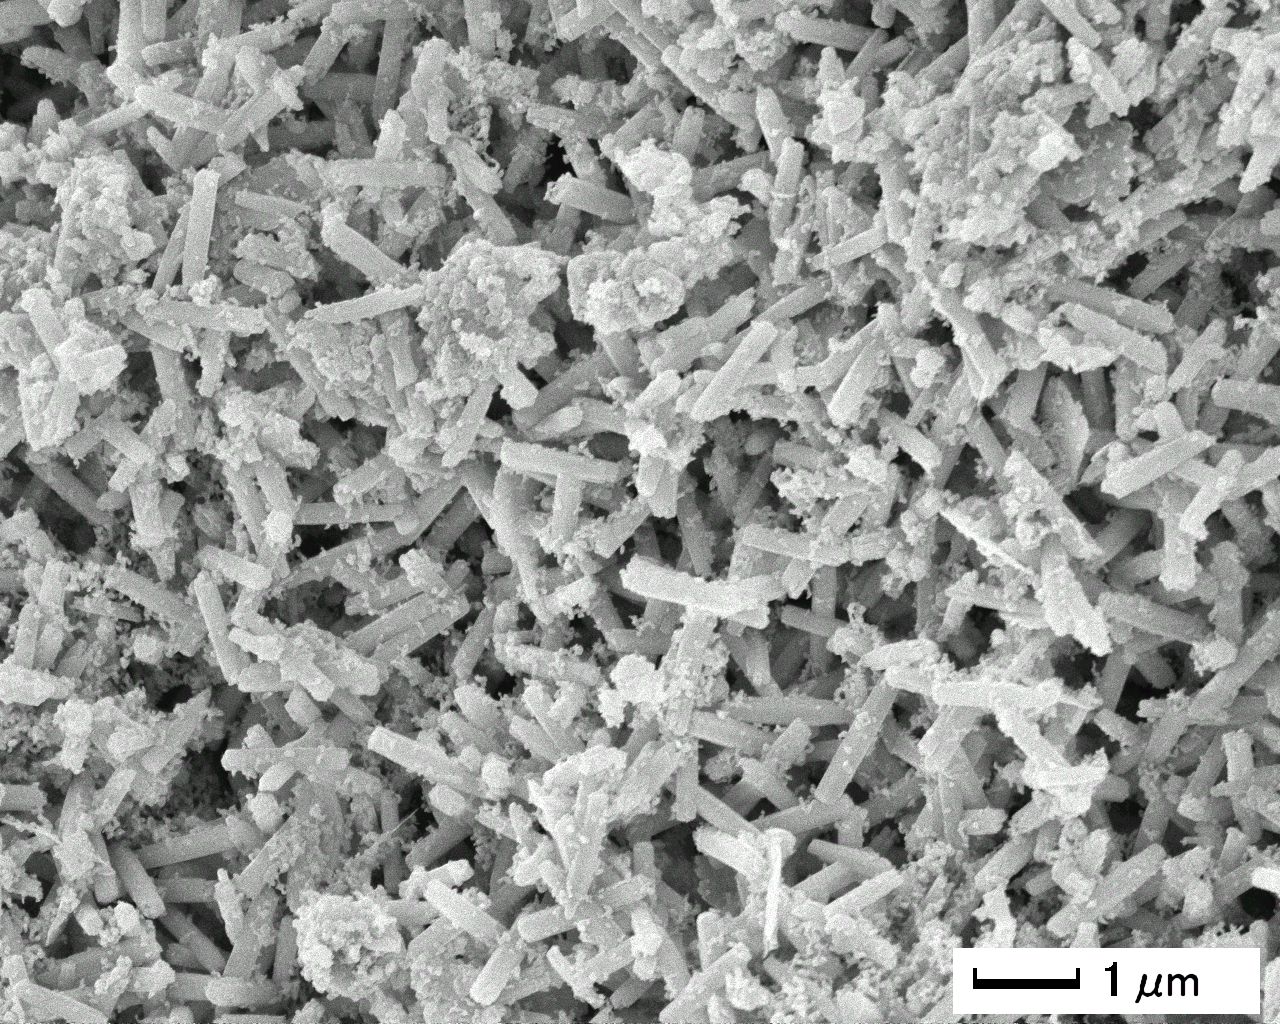

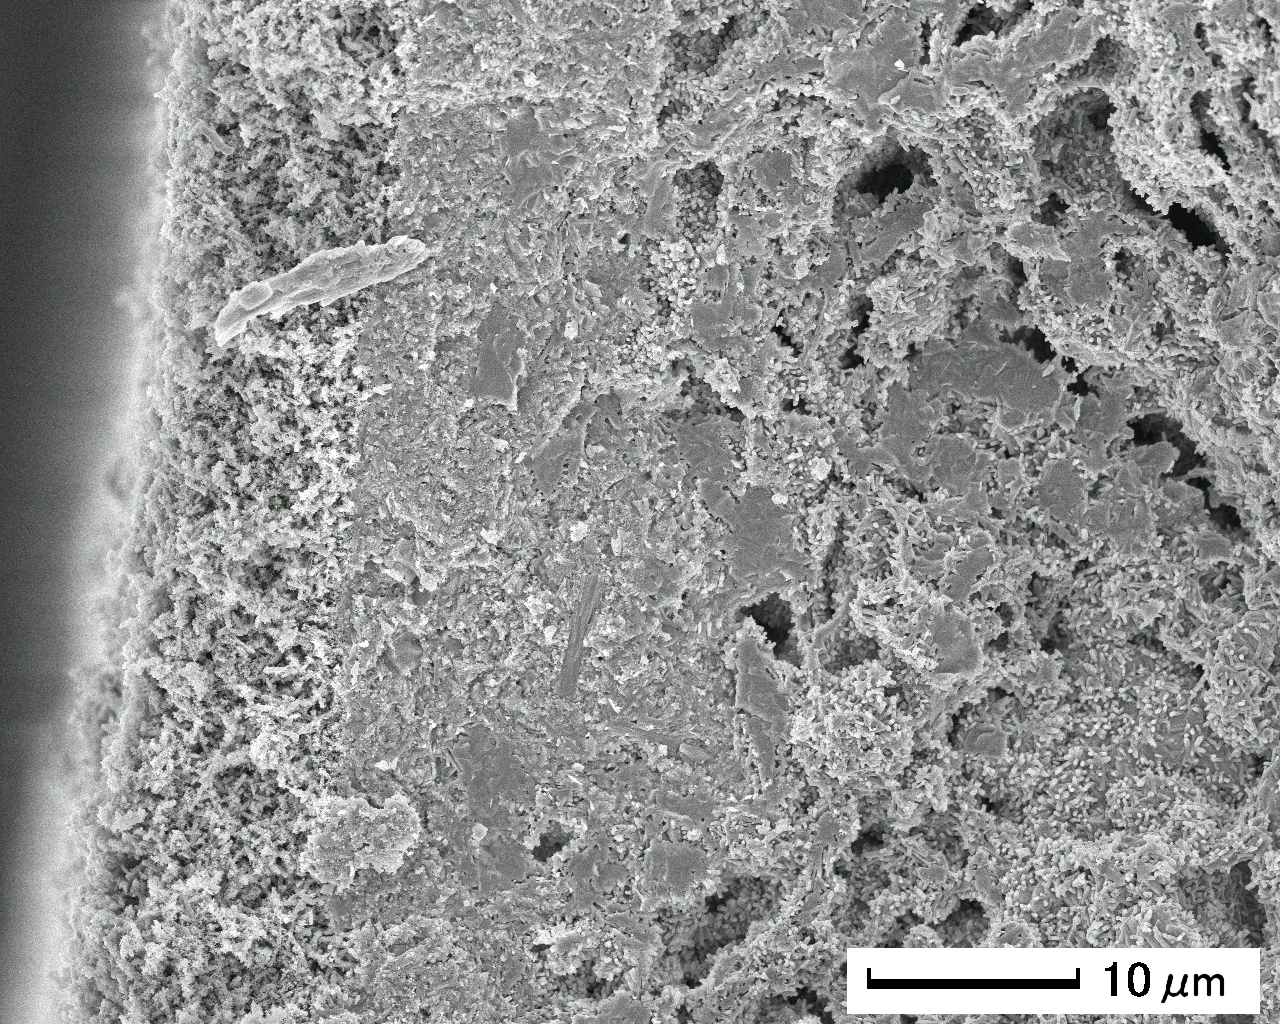

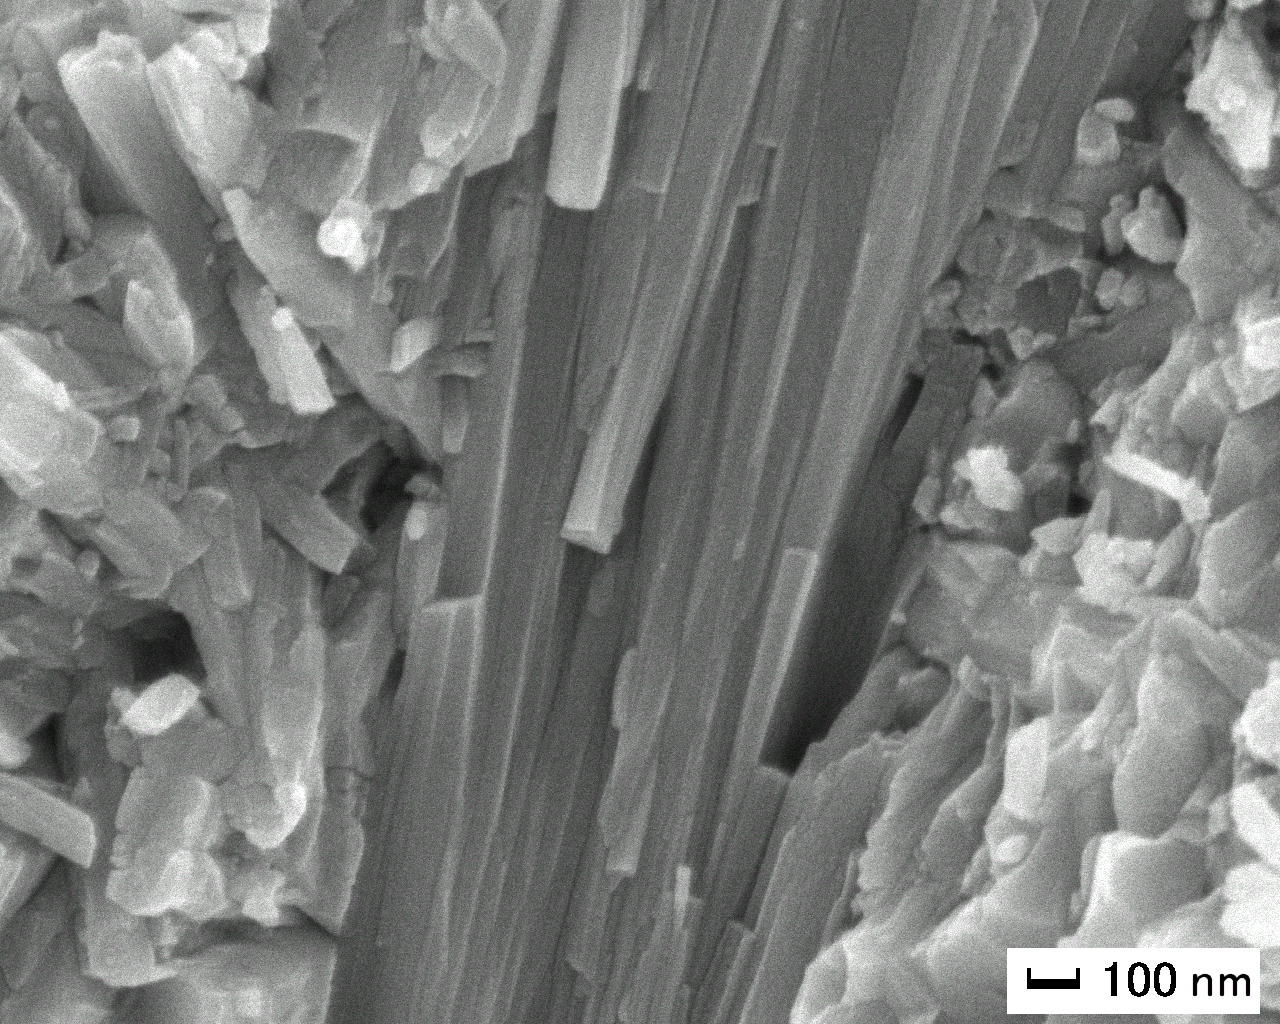


**Fig. S2** FE-SEM photographics of zeolite T membrane synthesized at 373K for 30h.

(a) surface (b) cross section (c) intermediate layer
